# Supplementary material
Source: Springer Nature journal article supplement (https://www.springerprofessional.de/resource/supplementary/40095_2012_54_MOESM20_ESM.pdf/11899712)

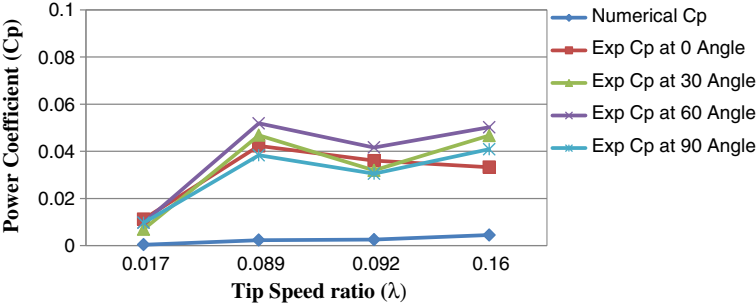

Supplement: MOESM20 [file 11899712]
